# Supplementary material for: Molecular recognition of catechols on the crystal-like surface of periodic mesoporous organosilica containing pyridinylethynylpyridine
Source: Royal Society of Chemistry journal article supplement (doi:10.1039/d2qi00608a), 2022-01-01
Supplement: d2qi00608a1.pdf [file d2qi00608a1.pdf]

## Electronic supplementary information for

### Molecular recognition of catechol on crystal-like surface of periodic mesoporous organosilica containing pyridinylethynylpyridine

Minoru Waki,<sup>\*a</sup> and Shinji Inagaki<sup>a</sup>

<sup>a</sup>Toyota Central R&D Labs., Inc., Nagakute, Aichi 480-1192, Japan.

#### General:

All reagents and solvents were commercially available and used without further purification. <sup>1</sup>H and <sup>13</sup>C NMR spectra were obtained using a Jeol ECX-400 spectrometer operating at 400 and 100 MHz, respectively. <sup>29</sup>Si dipolar decoupling (DD) and <sup>13</sup>C cross polarization (CP) magic-angle-spinning (MAS) NMR measurements were respectively performed at 79.49 and 100.6 MHz at a sample spinning frequency of 4 kHz using a Bruker AVANCE 400 spectrometer with a 7 mm zirconia rotor. For the <sup>29</sup>Si DD MAS NMR measurements, the repetition delay was 80 s, and the pulse width was 4.5 μs. For the <sup>13</sup>C CP MAS NMR measurements, the repetition delay was 5 s, the contact time was 1.75 ms, and the pulse width was 4.5 μs (<sup>1</sup>H 90° pulse). Chemical shifts were referenced to tetramethylsilane and glycine for <sup>29</sup>Si and <sup>13</sup>C NMR, respectively. XRD profiles were recorded on a Rigaku RINT-TTR diffractometer using Cu Kα radiation (50 kV, 300 mA). Nitrogen adsorption and desorption isotherms were measured using a Yuasa Nova3000e sorptometer. Brunauer-Emmett-Teller (BET) surface areas were calculated from the linear sections of BET plots (P/P<sub>0</sub> = 0.1–0.2). Pore size distributions were calculated using the DFT method (DFT kernel: N<sub>2</sub> at 77 K on silica, cylindrical pores, non-local density functional theory (NLDF) equilibrium model). Pore volumes were estimated by the t-plot method. Transmission electron microscopy (TEM) observations were performed using a Jeol JEM-EX2000 operating at 200 kV. IR spectra were collected on a Thermo Fisher Scientific Nicolet Avatar-360 FT-IR spectrometer using an attenuated total reflection (ATR) attachment. UV/vis absorption spectra were obtained using a Jasco V-670.

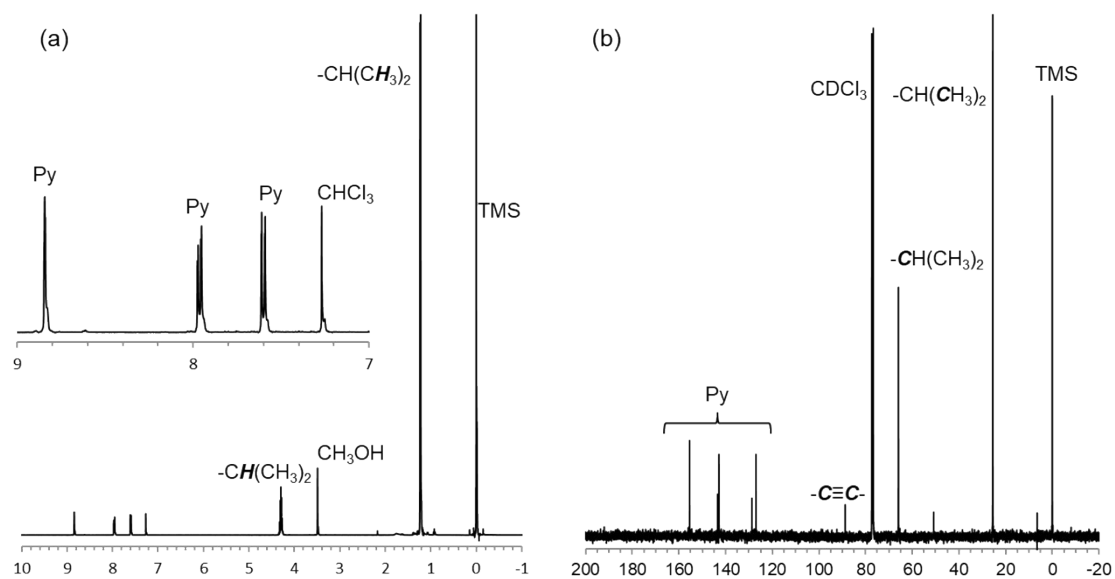

Fig. S1 (a)  $^1\text{H}$  and (b)  $^{13}\text{C}$  NMR spectra of PEPy-Si monomer.

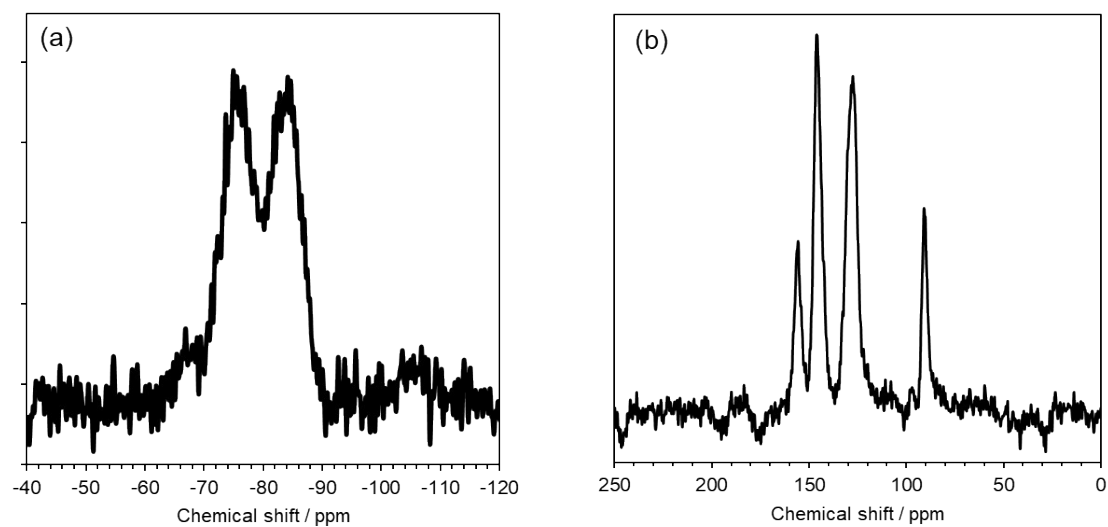

Fig. S2 (a)  $^{29}\text{Si}$  DD MAS and (b)  $^{13}\text{C}$  CP-MAS NMR spectra of PEPy-PMO.

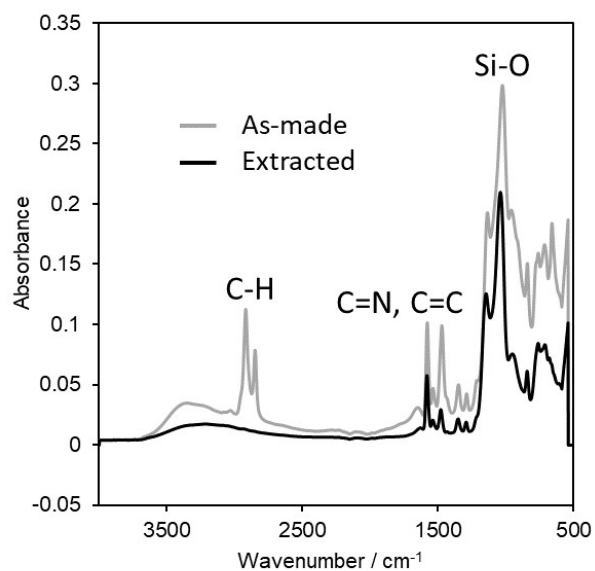

Fig. S3 IR spectra of PEPy-PMO.

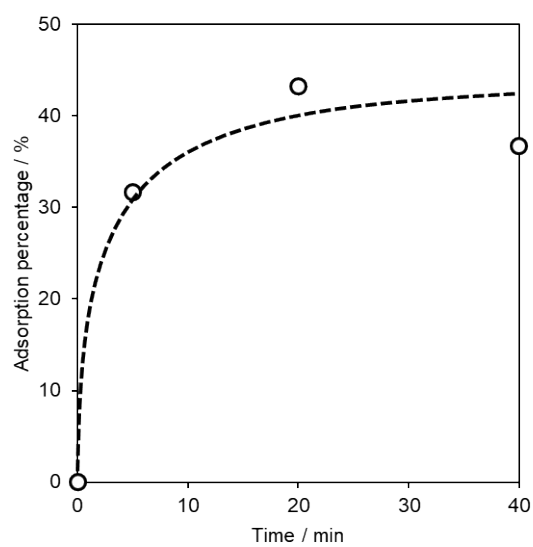

Fig. S4 Adsorption profile of catechol **1** by adding PEPy-PMO in a mixture of Et<sub>2</sub>O and hexane.

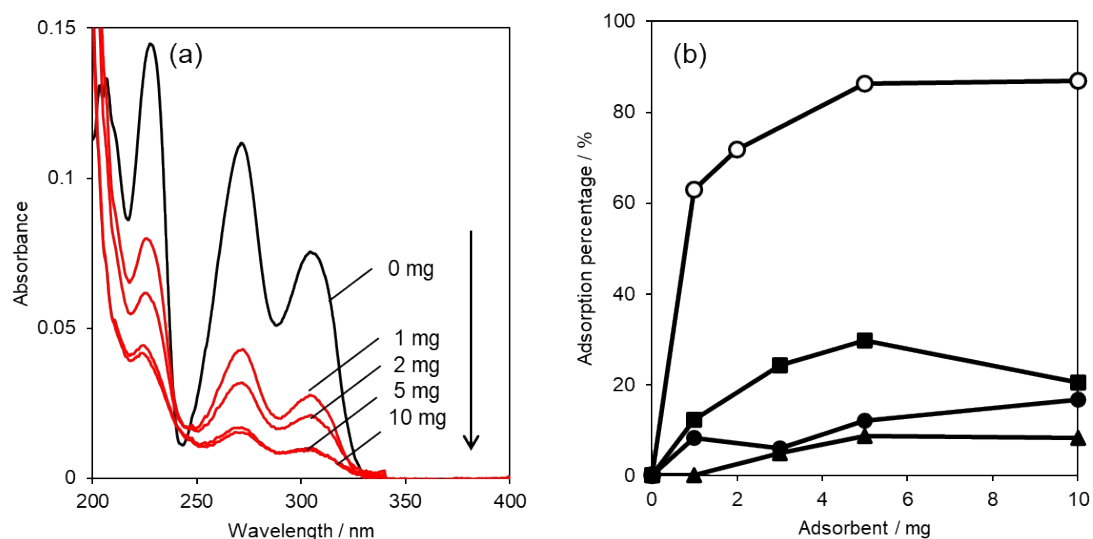

Fig. S5 (a) Changes in the UV/vis spectra of catechol **2** ( $1 \times 10^{-4}$  M) in a mixture of Et<sub>2</sub>O/hexane by adding PEPy-PMO. (b) Adsorption percentage of catechol **2** by adding PEPy-PMO (○), BPy-PMO (■), Bp-PMO (●), and FSM-16 (▲) using 0-10 mg of adsorbent.

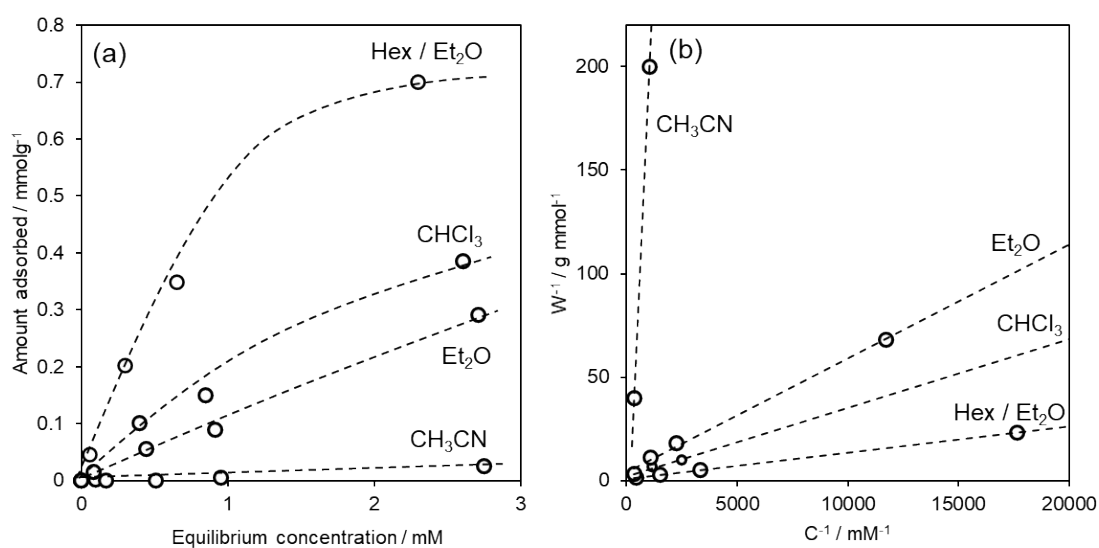

Fig. S6 (a) Langmuir non-linear and (b) linear plots obtained from the adsorption of catechol **1** with PEPy-PMO in various organic solvents. The dashed lines indicate the theoretical profiles.

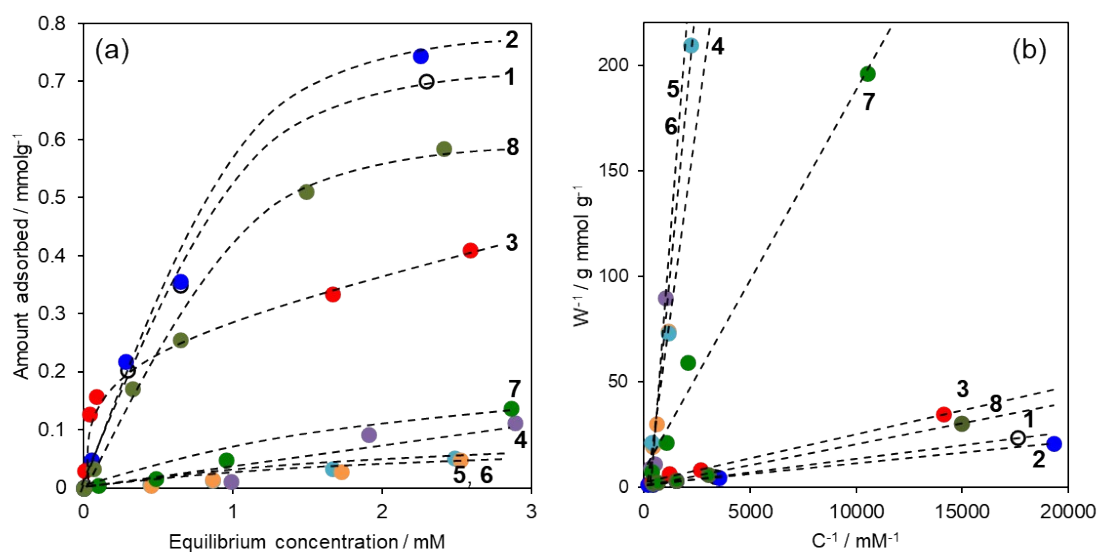

Fig. S7 (a) Langmuir non-linear and (b) linear plots obtained from the adsorption of catechols and its derivatives **1-8** with PEPy-PMO in a mixture of Et<sub>2</sub>O/hexane. The dashed lines indicate the theoretical profiles.

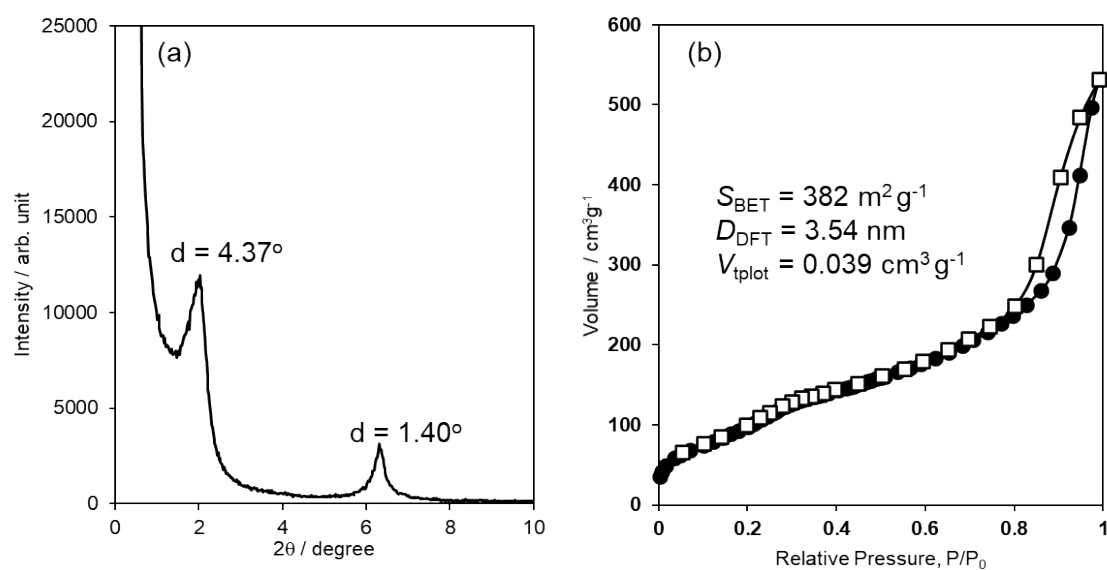

Fig. S8 XRD pattern and N<sub>2</sub> adsorption-desorption isotherms of Cate@PMO.

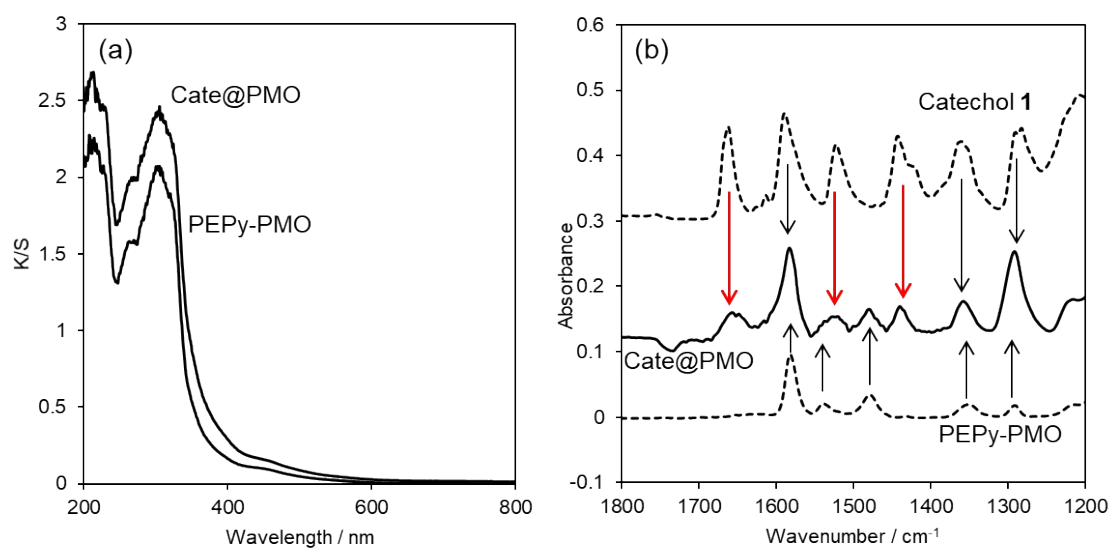

Fig. S9 (a) UV/vis diffuse reflectance and (b) FT-IR spectra of Cate@PMO. Red arrows indicated the C=C stretching vibration peaks of catechol adsorbed in Cate@PMO.

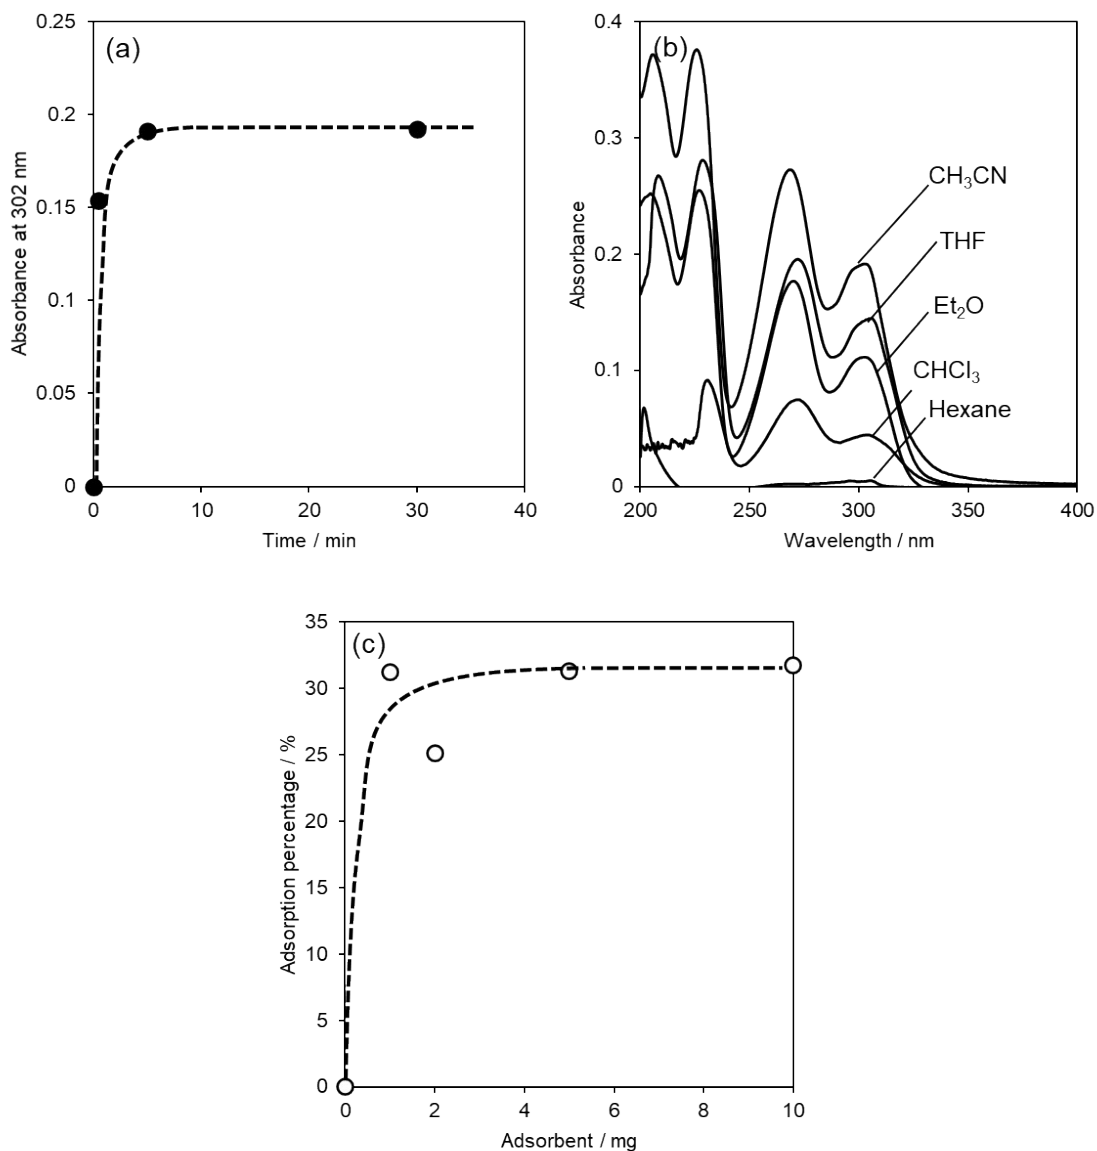

Fig. S10 (a) Release profile of catechol **1** by immersing Cate@PMO (1 mg) in CH<sub>3</sub>CN (1 mL). (b) UV/vis absorption spectra of released catechol **1** from Cate@PMO (1 mg) in various organic solvents (1 mL). (c) Adsorption percentages for catechol **1** ( $1 \times 10^{-4}$  M) in a mixture of Et<sub>2</sub>O/hexane by adding recovered PEPy-PMO (1 – 10 mg).

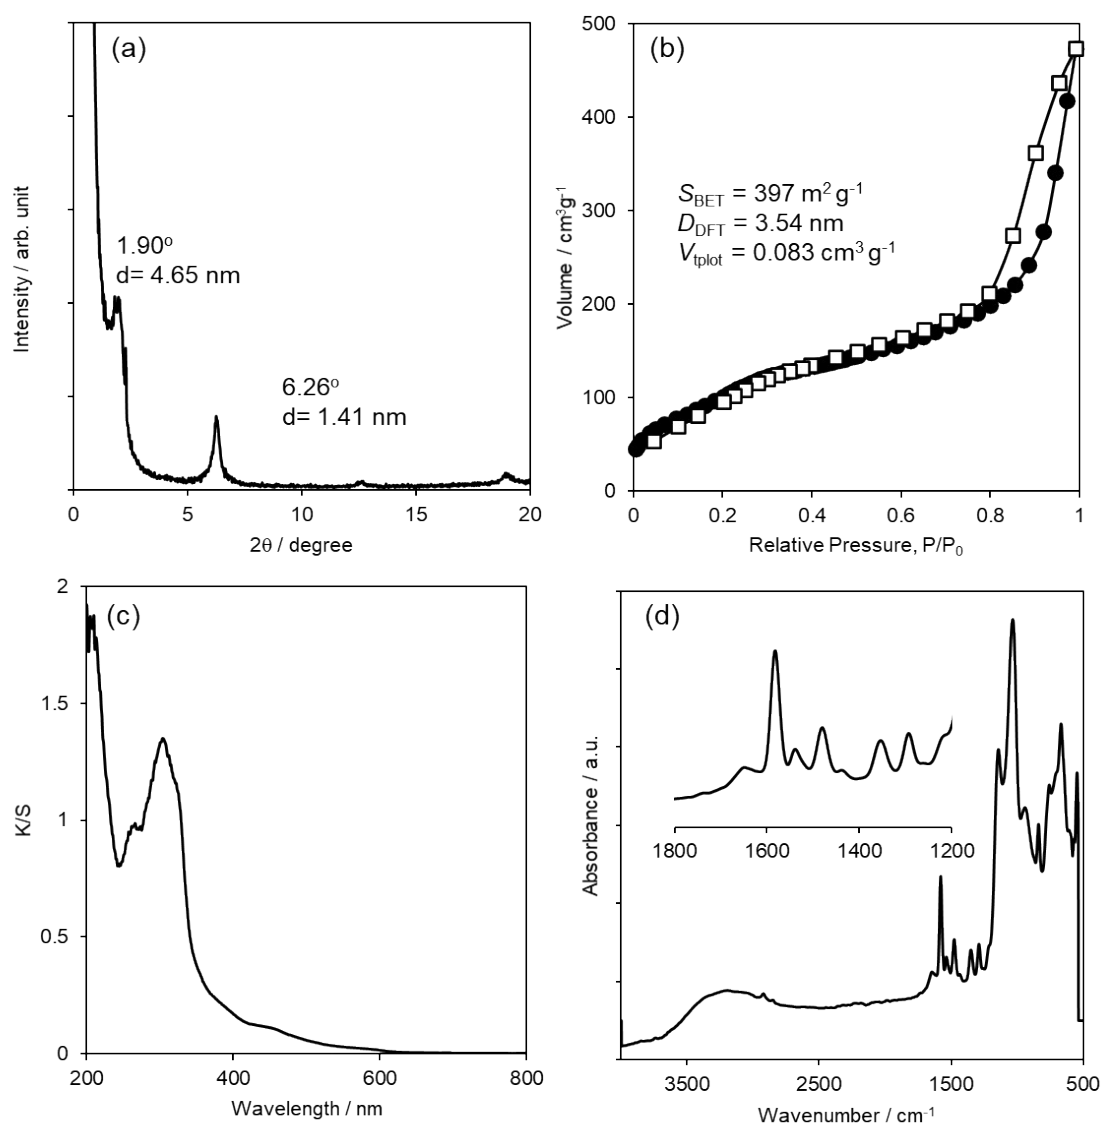

Fig. S11 (a) XRD pattern, (b)  $N_2$  adsorption-desorption isotherms, (c) UV/vis diffuse reflectance spectrum, and (d) FT-IR spectrum of PEPy-PMO after releasing catechol.



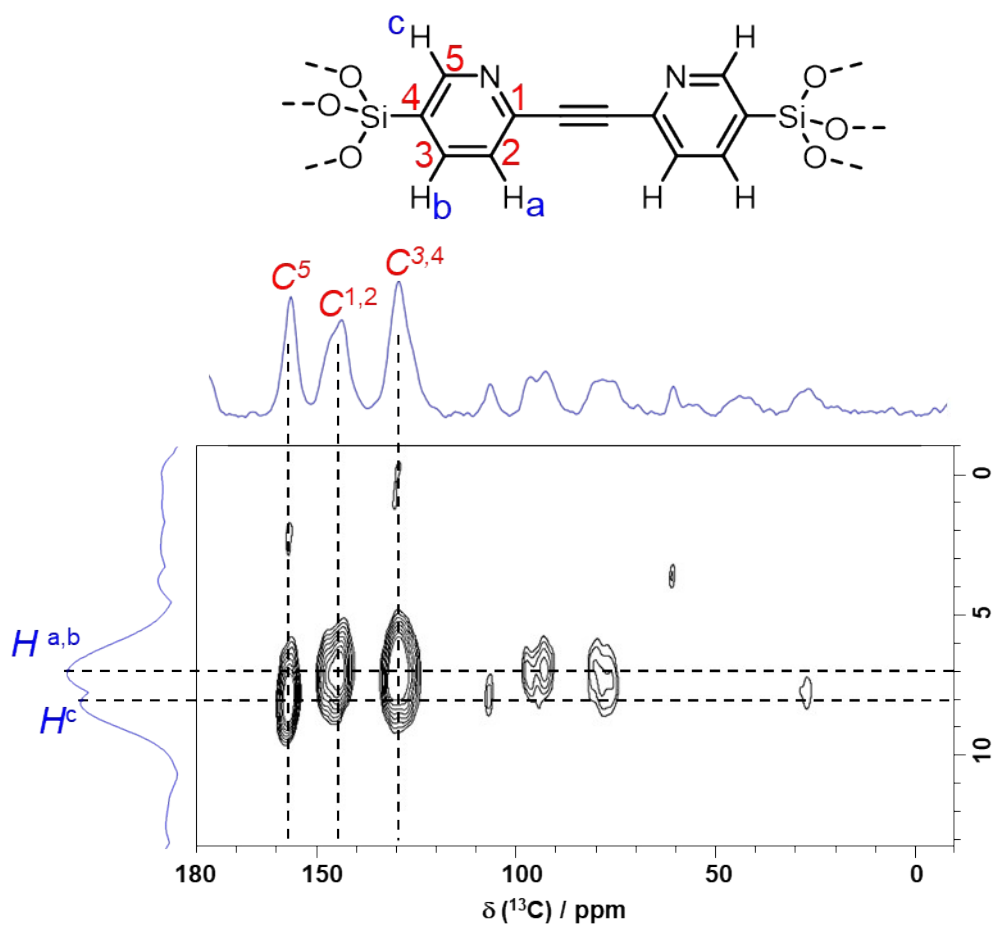

Fig. S12 <sup>1</sup>H-<sup>13</sup>C HETCOR MAS NMR spectrum of PEPy-PMO.

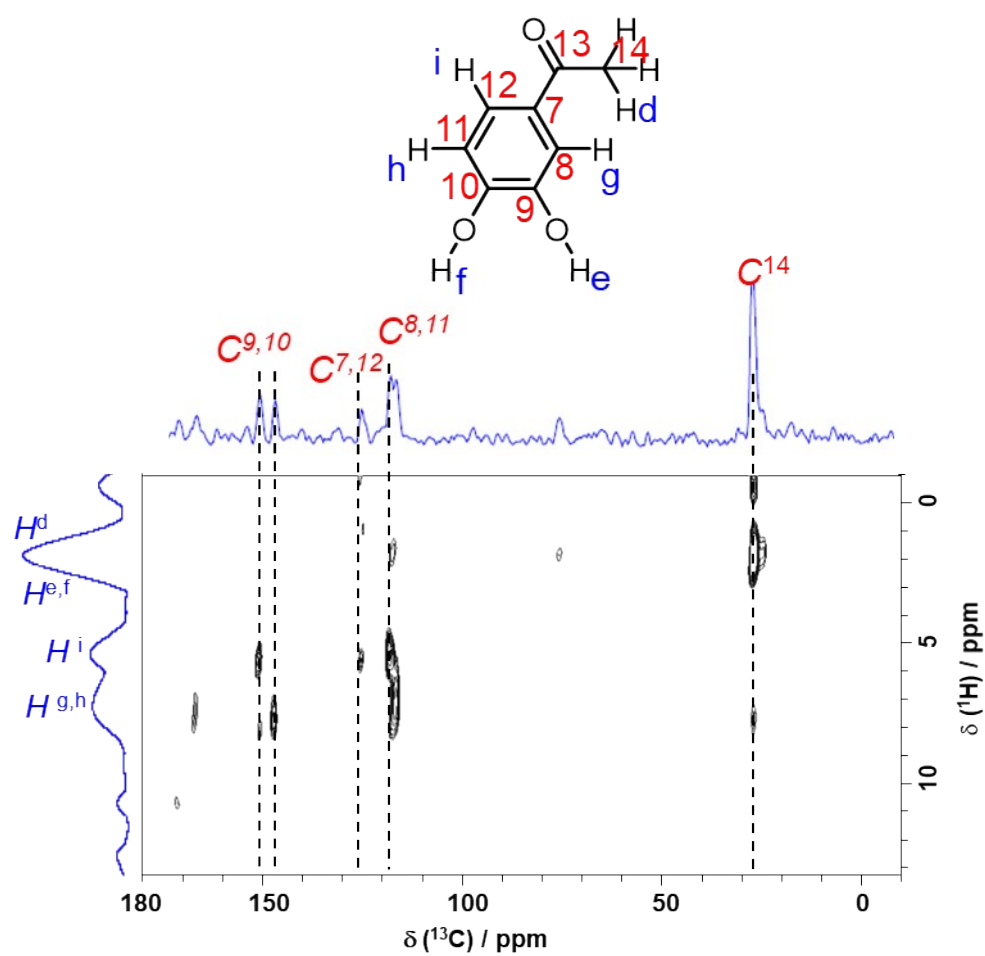

Fig. S13  $^1\text{H}$ - $^{13}\text{C}$  HETCOR MAS NMR spectrum of catechol **1**.

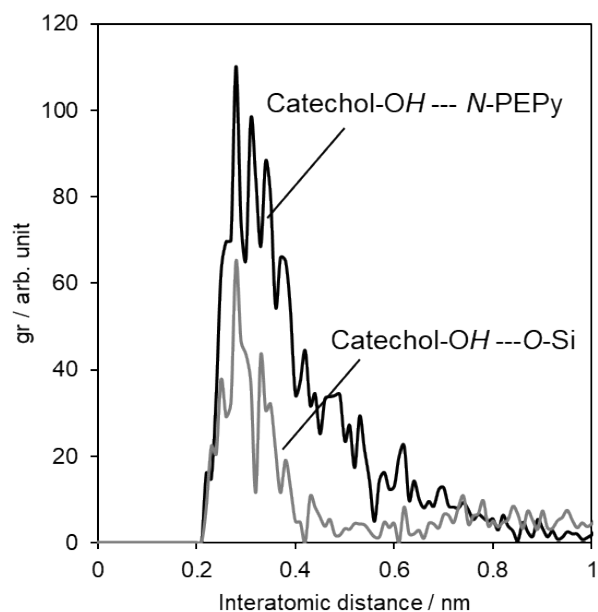

Fig. S14 Radial distribution function (gr) of the interatomic distance between the OH of catechol **1** and the N atom of PEPy (black) or OH of silanol (gray).

Table S1 Energy and population of the interaction between catechol **1** and PEPy in the MD simulation.<sup>[a]</sup>

|                                            | Energy / kcal mol <sup>-1</sup> |      | Population / % |
|--------------------------------------------|---------------------------------|------|----------------|
|                                            | Coulomb                         | VDW  |                |
| Catechol-OH---N-PEPy                       | -1.59                           | 0.03 | 10.4           |
| Catechol-OH---O-Si<br>(Catechol-O---HO-Si) | -1.39                           | 0.03 | 4.1            |
| Solvent-O---HO-Si                          | -0.27                           | 0.00 | 2.0            |

[a] Diffusion coefficient is  $0.38 \times 10^{-5} \text{ cm}^2 \text{ s}^{-1}$ .
